# Supplementary material for: More Is Not Always Better: Local Models Provide Accurate Predictions of Spectral Properties of Porphyrins
Source: Int J Mol Sci. 2022 Jan 21;23(3):1201. doi: 10.3390/ijms23031201 (PMC8835262; doi:10.3390/ijms23031201)
Supplement: Supplementary file 1 [file ijms-23-01201-s001.zip › supplementary_materials.xlsx]

## Sheet: Sheet1
More is Not Always Better: Local Models Provide Accurate Predictions of Spectral Properties of Porphyrins
Aleksey I. Rusanov 1, Olga A. Dmitrieva 1, Nugzar Zh. Mamardashvili and Igor V. Tetko 1-3,*
1	G.A. Krestov Institute of Solution Chemistry of the Russian Academy of Sciences, Akademicheskaya Street, 153045, Ivanovo, Russia; rusanov.a.i@mail.ru (A.I.R); dmitrievao.a@yandex.ru (O.A.D.); nugzarstras-burg@mail.ru (N.Zh.M); it@isc-ras.ru (I.V.T.)
2	Helmholtz Munich, Institute of Structural Biology, Ingolstädter Landstraße 1, D-85764 Neuherberg, Ger-many i.tetko@helmholtz-muenchen.de (I.V.T.)
3	BIGCHEM GmbH, Valerystr., 49, D-85716 Unterschleißheim, Germany i.tetko@helmholtz-muenchen.de (I.V.T.)
*	Correspondence: i.tetko@helmholtz-muenchen.de (I.V.T.), Tel.: + 49-89-31873575

## Sheet: Struture of porphyrins
Number of compound	Structure
1	R=CH3, Х=Н
2	R=C2H5, Х=Н
3	R=C3H7, Х=Н
4	R=C4H9, Х=Н
5	R=C5H11, Х=Н
6	R=C6H13, Х=Н
7	R=C7H15, Х=Н
8	R=C8H17, Х=Н
9	R=C9H19, Х=Н
10	R=C10H21, Х=Н
11	R=C11H23, Х=Н
12	R=C12H25, Х=Н
13	R=C13H27, Х=Н
14	R=C14H29, Х=Н
15	R=C15H31, Х=Н
16	R=CH3, Х=2-ОСН3
17	R=C2H5, Х=2-ОСН3
18	R=C3H7, Х=2-ОСН3
19	R=C4H9, Х=2-ОСН3
20	R=C5H11, Х=2-ОСН3
21	R=C6H13, Х=2-ОСН3
22	R=C7H15, Х=2-ОСН3
23	R=C8H17, Х=2-ОСН3
24	R=C9H19, Х=2-ОСН3
25	R=C10H21, Х=2-ОСН3
26	R=C11H23, Х=2-ОСН3
27	R=CH3, Х=3-ОСН3
28	R=C2H5, Х=3-ОСН3
29	R=C3H7, Х=3-ОСН3
30	R=C4H9, Х=3-ОСН3
31	R=C5H11, Х=3-ОСН3
32	R=C6H13, Х=3-ОСН3
33	R=C7H15, Х=3-ОСН3
34	R=C8H17, Х=3-ОСН3
35	R=C9H19, Х=3-ОСН3
36	R=C10H21, Х=3-ОСН3
37	R=C11H23, Х=3-ОСН3
38	R=CH3, Х=4-ОСН3
39	R=C2H5, Х=4-ОСН3
40	R=C3H7, Х=4-ОСН3
41	R=C4H9, Х=4-ОСН3
42	R=C5H11, Х=4-ОСН3
43	R=C6H13, Х=4-ОСН3
44	R=C7H15, Х=4-ОСН3
45	R=C8H17, Х=4-ОСН3
46	R=C9H19, Х=4-ОСН3
47	R=C10H21, Х=4-ОСН3
48	R=C11H23, Х=4-ОСН3
49	R=CH3, Х=2-ОН
50	R=C2H5, Х=2-ОН
51	R=C3H7, Х=2-ОН
52	R=C4H9, Х=2-ОН
53	R=C5H11, Х=2-ОН
54	R=C6H13, Х=2-ОН
55	R=C7H15, Х=2-ОН
56	R=C8H17, Х=2-ОН
57	R=C9H19, Х=2-ОН
58	R=C10H21, Х=2-ОН
59	R=C11H23, Х=2-ОН
60	R=CH3, Х=3-ОН
61	R=C2H5, Х=3-ОН
62	R=C3H7, Х=3-ОН
63	R=C4H9, Х=3-ОН
64	R=C5H11, Х=3-ОН
65	R=C6H13, Х=3-ОН
66	R=C7H15, Х=3-ОН
67	R=C8H17, Х=3-ОН
68	R=C9H19, Х=3-ОН
69	R=C10H21, Х=3-ОН
70	R=C11H23, Х=3-ОН
71	R=CH3, Х=4-ОН
72	R=C2H5, Х=4-ОН
73	R=C3H7, Х=4-ОН
74	R=C4H9, Х=4-ОН
75	R=C5H11, Х=4-ОН
76	R=C6H13, Х=4-ОН
77	R=C7H15, Х=4-ОН
78	R=C8H17, Х=4-ОН
79	R=C9H19, Х=4-ОН
80	R=C10H21, Х=4-ОН
81	R=C11H23, Х=4-ОН
82	R=CH3, Х=3-NO2
83	R=C2H5, Х=3-NO2
84	R=C3H7, Х=3-NO2
85	R=C4H9, Х=3-NO2
86	R=C5H11, Х=3-NO2
87	R=C6H13, Х=3-NO2
88	R=C7H15, Х=3-NO2
89	R=C8H17, Х=3-NO2
90	R=C9H19, Х=3-NO2
91	R=C10H21, Х=3-NO2
92	R=C11H23, Х=3-NO2
93	R=CH3, Х=4-NO2
94	R=C2H5, Х=4-NO2
95	R=C3H7, Х=4-NO2
96	R=C4H9, Х=4-NO2
97	R=C5H11, Х=4-NO2
98	R=C6H13, Х=4-NO2
99	R=C7H15, Х=4-NO2
100	R=C8H17, Х=4-NO2
101	R=C9H19, Х=4-NO2
102	R=C10H21, Х=4-NO2
103	R=C11H23, Х=4-NO2
104	R=CH3, Х=4-NH2
105	R=C2H5, Х=4-NH2
106	R=C3H7, Х=4-NH2
107	R=C4H9, Х=4-NH2
108	R=C5H11, Х=4-NH2
109	R=CH3, Х=3-NH2
110	R=C2H5, Х=3-NH2
111	R=C3H7, Х=3-NH2
112	R=C4H9, Х=3-NH2
113	R=C2H5, Х=Н
114	R=C3H7, Х=Н
115	R=C4H9, Х=Н
116	R=C5H11, Х=Н
117	R=C6H13, Х=Н
118	R=C7H15, Х=Н
119	R=C8H17, Х=Н
120	R=C9H19, Х=Н
121	R=C10H21, Х=Н
122	R=C11H23, Х=Н
123	R=C12H25, Х=Н
124	R=C2H5, Х=2-ОСН3
125	R=C3H7, Х=2-ОСН3
126	R=C4H9, Х=2-ОСН3
127	R=C5H11, Х=2-ОСН3
128	R=C6H13, Х=2-ОСН3
129	R=C7H15, Х=2-ОСН3
130	R=C8H17, Х=2-ОСН3
131	R=C9H19, Х=2-ОСН3
132	R=C10H21, Х=2-ОСН3
133	R=C11H23, Х=2-ОСН3
134	R=C12H25, Х=2-ОСН3
135	R=C2H5, Х=3-ОСН3
136	R=C3H7, Х=3-ОСН3
137	R=C4H9, Х=3-ОСН3
138	R=C5H11, Х=3-ОСН3
139	R=C6H13, Х=3-ОСН3
140	R=C7H15, Х=3-ОСН3
141	R=C8H17, Х=3-ОСН3
142	R=C9H19, Х=3-ОСН3
143	R=C10H21, Х=3-ОСН3
144	R=C11H23, Х=3-ОСН3
145	R=C12H25, Х=3-ОСН3
146	R=C2H5, Х=4-ОСН3
147	R=C3H7, Х=4-ОСН3
148	R=C4H9, Х=4-ОСН3
149	R=C5H11, Х=4-ОСН3
150	R=C6H13, Х=4-ОСН3
151	R=C7H15, Х=4-ОСН3
152	R=C8H17, Х=4-ОСН3
153	R=C9H19, Х=4-ОСН3
154	R=C10H21, Х=4-ОСН3
155	R=C11H23, Х=4-ОСН3
156	R=C12H25, Х=4-ОСН3
157	R=C2H5, Х=2-ОН
158	R=C3H7, Х=2-ОН
159	R=C4H9, Х=2-ОН
160	R=C5H11, Х=2-ОН
161	R=C6H13, Х=2-ОН
162	R=C7H15, Х=2-ОН
163	R=C8H17, Х=2-ОН
164	R=C9H19, Х=2-ОН
165	R=C10H21, Х=2-ОН
166	R=C11H23, Х=2-ОН
167	R=C12H25, Х=2-ОН
168	R=C2H5, Х=3-ОН
169	R=C3H7, Х=3-ОН
170	R=C4H9, Х=3-ОН
171	R=C5H11, Х=3-ОН
172	R=C6H13, Х=3-ОН
173	R=C7H15, Х=3-ОН
174	R=C8H17, Х=3-ОН
175	R=C9H19, Х=3-ОН
176	R=C10H21, Х=3-ОН
177	R=C11H23, Х=3-ОН
178	R=C12H25, Х=3-ОН
179	R=C2H5, Х=4-ОН
180	R=C3H7, Х=4-ОН
181	R=C4H9, Х=4-ОН
182	R=C5H11, Х=4-ОН
183	R=C6H13, Х=4-ОН
184	R=C7H15, Х=4-ОН
185	R=C8H17, Х=4-ОН
186	R=C9H19, Х=4-ОН
187	R=C10H21, Х=4-ОН
188	R=C11H23, Х=4-ОН
189	R=C12H25, Х=4-ОН
190	R=C2H5, Х=3-NO2
191	R=C3H7, Х=3-NO2
192	R=C4H9, Х=3-NO2
193	R=C5H11, Х=3-NO2
194	R=C6H13, Х=3-NO2
195	R=C7H15, Х=3-NO2
196	R=C8H17, Х=3-NO2
197	R=C9H19, Х=3-NO2
198	R=C10H21, Х=3-NO2
199	R=C11H23, Х=3-NO2
200	R=C12H25, Х=3-NO2
201	R=C2H5, Х=4-NO2
202	R=C3H7, Х=4-NO2
203	R=C4H9, Х=4-NO2
204	R=C5H11, Х=4-NO2
205	R=C6H13, Х=4-NO2
206	R=C7H15, Х=4-NO2
207	R=C8H17, Х=4-NO2
208	R=C9H19, Х=4-NO2
209	R=C10H21, Х=4-NO2
210	R=C11H23, Х=4-NO2
211	R=C12H25, Х=4-NO2
212	R=C2H5, Х=3-NH2
213	R=C3H7, Х=3-NH2
214	R=C4H9, Х=3-NH2
215	R=C5H11, Х=3-NH2
216	R=C6H13, Х=3-NH2
217	R=C7H15, Х=3-NH2
218	R=C8H17, Х=3-NH2
219	R=C9H19, Х=3-NH2
220	R=C10H21, Х=3-NH2
221	R=C11H23, Х=3-NH2
222	R=C12H25, Х=3-NH2
223	R=C2H5, Х=4-NH2
224	R=C3H7, Х=4-NH2
225	R=C4H9, Х=4-NH2
226	R=C5H11, Х=4-NH2
227	R=C6H13, Х=4-NH2
228	R=C7H15, Х=4-NH2
229	R=C8H17, Х=4-NH2
230	R=C9H19, Х=4-NH2
231	R=C10H21, Х=4-NH2
232	R=C11H23, Х=4-NH2
233	R=CH3, Х=Н
234	R=C2H5, Х=Н
235	R=C3H7, Х=Н
236	R=C4H9, Х=Н
237	R=C5H11, Х=Н
238	R=C6H13, Х=Н
239	R=C7H15, Х=Н
240	R=C8H17, Х=Н
241	R=C9H19, Х=Н
242	R=C10H21, Х=Н
243	R=C11H23, Х=Н
244	R=C12H25, Х=Н
245	R=C13H27, Х=Н
246	R=C14H29, Х=Н
247	R=C15H31, Х=Н
248	R=CH3, Х=2-ОСН3
249	R=C2H5, Х=2-ОСН3
250	R=C3H7, Х=2-ОСН3
251	R=C4H9, Х=2-ОСН3
252	R=C5H11, Х=2-ОСН3
253	R=C6H13, Х=2-ОСН3
254	R=C7H15, Х=2-ОСН3
255	R=C8H17, Х=2-ОСН3
256	R=C9H19, Х=2-ОСН3
257	R=C10H21, Х=2-ОСН3
258	R=C11H23, Х=2-ОСН3
259	R=CH3, Х=3-ОСН3
260	R=C2H5, Х=3-ОСН3
261	R=C3H7, Х=3-ОСН3
262	R=C4H9, Х=3-ОСН3
263	R=C5H11, Х=3-ОСН3
264	R=C6H13, Х=3-ОСН3
265	R=C7H15, Х=3-ОСН3
266	R=C8H17, Х=3-ОСН3
267	R=C9H19, Х=3-ОСН3
268	R=C10H21, Х=3-ОСН3
269	R=C11H23, Х=3-ОСН3
270	R=CH3, Х=4-ОСН3
271	R=C2H5, Х=4-ОСН3
272	R=C3H7, Х=4-ОСН3
273	R=C4H9, Х=4-ОСН3
274	R=C5H11, Х=4-ОСН3
275	R=C6H13, Х=4-ОСН3
276	R=C7H15, Х=4-ОСН3
277	R=C8H17, Х=4-ОСН3
278	R=C9H19, Х=4-ОСН3
279	R=C10H21, Х=4-ОСН3
280	R=C11H23, Х=4-ОСН3
281	R=CH3, Х=2-ОН
282	R=C2H5, Х=2-ОН
283	R=C3H7, Х=2-ОН
284	R=C4H9, Х=2-ОН
285	R=C5H11, Х=2-ОН
286	R=C6H13, Х=2-ОН
287	R=C7H15, Х=2-ОН
288	R=C8H17, Х=2-ОН
289	R=C9H19, Х=2-ОН
290	R=C10H21, Х=2-ОН
291	R=C11H23, Х=2-ОН
292	R=CH3, Х=3-ОН
293	R=C2H5, Х=3-ОН
294	R=C3H7, Х=3-ОН
295	R=C4H9, Х=3-ОН
296	R=C5H11, Х=3-ОН
297	R=C6H13, Х=3-ОН
298	R=C7H15, Х=3-ОН
299	R=C8H17, Х=3-ОН
300	R=C9H19, Х=3-ОН
301	R=C10H21, Х=3-ОН
302	R=C11H23, Х=3-ОН
303	R=CH3, Х=4-ОН
304	R=C2H5, Х=4-ОН
305	R=C3H7, Х=4-ОН
306	R=C4H9, Х=4-ОН
307	R=C5H11, Х=4-ОН
308	R=C6H13, Х=4-ОН
309	R=C7H15, Х=4-ОН
310	R=C8H17, Х=4-ОН
311	R=C9H19, Х=4-ОН
312	R=C10H21, Х=4-ОН
313	R=C11H23, Х=4-ОН
314	R=CH3, Х=3-NO2
315	R=C2H5, Х=3-NO2
316	R=C3H7, Х=3-NO2
317	R=C4H9, Х=3-NO2
318	R=C5H11, Х=3-NO2
319	R=C6H13, Х=3-NO2
320	R=C7H15, Х=3-NO2
321	R=C8H17, Х=3-NO2
322	R=C9H19, Х=3-NO2
323	R=C10H21, Х=3-NO2
324	R=C11H23, Х=3-NO2
325	R=CH3, Х=4-NO2
326	R=C2H5, Х=4-NO2
327	R=C3H7, Х=4-NO2
328	R=C4H9, Х=4-NO2
329	R=C5H11, Х=4-NO2
330	R=C6H13, Х=4-NO2
331	R=C7H15, Х=4-NO2
332	R=C8H17, Х=4-NO2
333	R=C9H19, Х=4-NO2
334	R=C10H21, Х=4-NO2
335	R=C11H23, Х=4-NO2

## Sheet:  UV-vis spectra of porphyrins
Porphyrin	I	II	III	IV	Soret
1	628.0 (3.48)	576.0 (3.96)	539.0 (3.86)	507.0 (4.34)	410.2 (5.41)
2	628.1 (3.49)	576.2 (3.97)	539.2 (3.87)	507.1 (4.36)	410.5 (5.42)
3	628.3 (3.48)	576.3 (3.97)	539.3 (3.87)	507.3 (4.35)	410.5 (5.41)
4	628.1 (3.48)	576.0 (3.96)	539.0 (3.86)	507.0 (4.34)	410.3 (5.42)
5	628.2 (3.47)	576.2 (3.97)	539.2 (3.88)	507.2 (4.33)	410.2 (5.40)
6	628.3 (3.48)	576.5 (3.99)	539.3 (3.89)	507.3 (4.35)	410.4 (5.43)
7	628.2 (3.45)	576.3 (3.96)	539.3 (3.91)	507.4 (4.37)	410.5 (5.45)
8	628.5 (3.46)	576.4 (3.98)	539.5 (3.95)	507.5 (4.39)	410.6 (5.47)
9	628.4 (3.48)	576.7 (3.99)	539.8 (3.96)	507.7 (4.41)	410.9 (5.49)
10	628.6 (3.49)	576.8 (3.97)	539.7 (3.98)	507.8 (4.43)	410.7 (5.50)
11	628.7 (3.47)	576.5 (3.93)	539.4 (3.94)	507.6 (4.45)	410.9 (5.47)
12	628.8 (3.46)	576.7 (3.91)	539.2 (3.93)	507.7 (4.44)	410.7 (5.45)
13	628.5 (3.43)	576.8 (3.95)	539.4 (3.95)	507.6 (4.41)	410.4 (5.46)
14	628.3 (3.41)	576.9 (3.93)	539.5 (3.92)	507.5 (4.40)	410.6 (5.49)
15	628.5 (3.49)	576.3 (3.97)	539.3 (3.87)	507.3 (4.35)	410.3 (5.45)
16	630.0 (3.45)	576.3 (3.85)	540.2 (3.76)	507.2 (4.23)	411.3 (5.33)
17	630.1 (3.46)	576.2 (3.84)	540.3 (3.75)	507.3 (4.24)	411.4 (5.34)
18	630.2 (3.45)	576.4 (3.85)	540.2 (3.76)	507.5 (4.25)	411.5 (5.35)
19	630.3 (3.42)	576.2 (3.86)	540.3 (3.77)	507.4 (4.25)	411.6 (5.36)
20	630.4 (3.44)	576.3 (3.87)	540.4 (3.78)	507.5 (4.26)	411.7 (5.37)
21	630.5 (3.45)	576.4 (3.84)	540.5 (3.79)	507.7 (4.27)	411.8 (5.39)
22	630.6 (3.47)	576.6 (3.83)	540.7 (3.81)	507.6 (4.28)	411.9 (5.38)
23	630.6 (3.46)	576.5 (3.85)	540.5 (3.78)	507.5 (4.25)	411.7 (5.41)
24	630.7 (3.49)	576.4 (3.83)	540.6 (3.79)	507.7 (4.26)	411.8 (5.42)
25	630.8 (3.50)	576.3 (3.86)	540.5 (3.80)	507.6 (4.25)	412.0 (5.43)
26	630.9 (3.49)	576.2 (3.89)	540.4 (3.81)	507.5 (4.28)	411.9 (5.39)
27	627.1 (3.58)	575.0 (3.85)	540.1 (3.74)	506.8 (4.24)	409.5 (5.35)
28	627.1 (3.58)	575.0 (3.85)	540.1 (3.74)	506.8 (4.24)	409.5 (5.34)
29	626.7 (3.57)	574.9 (3.82)	539.8 (3.73)	506.5 (4.23)	409.3 (5.35)
30	626.6 (3.56)	574.8 (3.80)	539.3 (3.72)	506.3 (4.22)	409.2 (5.33)
31	626.5 (3.55)	574.8 (3.79)	539.1 (3.70)	506.1 (4.20)	409.1 (5.34)
32	626.3 (3.56)	574.3 (3.77)	539.0 (3.69)	505.9 (4.19)	408.9 (5.32)
33	626.1 (3.55)	574.1 (3.75)	538.8 (3.67)	505.7 (4.17)	408.7 (5.31)
34	626.0 (3.54)	573.9 (3.76)	538.7 (3.66)	505.6 (4.19)	408.5 (5.30)
35	625.7 (3.52)	573.7 (3.74)	538.5 (3.65)	505.5 (4.17)	408.3 (5.28)
36	625.5 (3.51)	573.5 (3.72)	538.3 (3.63)	505.3 (4.15)	408.2 (5.27)
37	625.1 (3.53)	573.2 (3.75)	538.1 (3.64)	505.5 (4.17)	408.0 (5.25)
38	629.0 (3.46)	576.3 (3.93)	540.2 (3.80)	507.3 (4.28)	411.5 (5.39)
39	629.1 (3.46)	576.4 (3.94)	540.3 (3.82)	507.5 (4.29)	411.6 (5.40)
40	629.3 (3.47)	576.3 (3.93)	540.2 (3.80)	507.3 (4.28)	411.5 (5.39)
41	629.5 (3.47)	576.3 (3.93)	540.2 (3.80)	507.3 (4.28)	411.5 (5.39)
42	629.7 (3.48)	576.6 (3.94)	540.3 (3.82)	507.5 (4.29)	411.6 (5.41)
43	630.0 (3.48)	577.1 (3.95)	540.4 (3.83)	507.9 (4.30)	411.7 (5.40)
44	630.0 (3.48)	577.3 (3.94)	540.5 (3.84)	507.9 (4.29)	411.8 (5.41)
45	630.3 (3.49)	577.6 (3.96)	540.6 (3.83)	508.0 (4.28)	412.1 (5.40)
46	630.6 (3.49)	577.9 (3.96)	540.8 (3.84)	508.1 (4.30)	412.3 (5.42)
47	630.8 (3.50)	578.1 (3.97)	540.9 (3.85)	508.2 (4.28)	412.4 (5.43)
48	631.0 (3.50)	578.3 (3.97)	541.2 (3.86)	508.3 (4.31)	412.5 (5.44)
49	630.1 (3.58)	576.3 (3.92)	540.2 (3.87)	507.2 (4.21)	410.7 (5.30)
50	630.3 (3.57)	576.5 (3.92)	540.3 (3.86)	507.3 (4.23)	410.6 (5.29)
51	630.5 (3.56)	576.4 (3.91)	540.4 (3.85)	507.4 (4.22)	410.5 (5.28)
52	630.7 (3.55)	576.6 (3.89)	540.4 (3.83)	507.5 (4.22)	410.5 (5.27)
53	630.9 (3.54)	576.8 (3.92)	540.5 (3.83)	507.5 (4.19)	410.4 (5.26)
54	631.1 (3.54)	577.0 (3.91)	540.6 (3.82)	507.6 (4.17)	410.3 (5.25)
55	631.3 (3.53)	577.3 (3.90)	540.7 (3.82)	507.8 (4.16)	410.5 (5.23)
56	631.6 (3.52)	577.5 (3.89)	540.8 (3.81)	507.0 (4.15)	410.7 (5.22)
57	631.8 (3.51)	577.6 (3.88)	540.9 (3.81)	506.8 (4.14)	410.3 (5.25)
58	632.0 (3.50)	577.8 (3.89)	541.0 (3.80)	506.4 (4.13)	410.1 (5.23)
59	632.5 (3.50)	577.9 (3.90)	541.2 (3.80)	506.1 (4.12)	409.9 (5.19)
60	630.1 (3.58)	576.3 (3.92)	542.3 (3.89)	507.3 (4.21)	410.7 (5.30)
61	630.5 (3.56)	576.7 (3.92)	542.6 (3.87)	507.5 (4.20)	410.9 (5.30)
62	630.7 (3.54)	576.9 (3.91)	542.8 (3.85)	507.8 (4.19)	411.2 (5.27)
63	631.2 (3.53)	577.2 (3.92)	542.9 (3.84)	508.0 (4.18)	411.5 (5.26)
64	632.1 (3.52)	577.9 (3.90)	543.3 (3.86)	508.3 (4.17)	411.6 (5.27)
65	632.4 (3.51)	578.1 (3.89)	543.5 (3.85)	508.6 (4.15)	411.9 (5.25)
66	632.7 (3.50)	578.3 (3.88)	543.7 (3.86)	508.7 (4.16)	412.1 (5.23)
67	633.3 (3.49)	578.7 (3.87)	543.9 (3.84)	508.9 (4.14)	412.2 (5.21)
68	633.5 (3.48)	579.3 (3.85)	544.0 (3.83)	508.7 (4.14)	412.3 (5.20)
69	633.8 (3.46)	579.5 (3.82)	544.1 (3.82)	509.3 (4.13)	412.4 (5.21)
70	634.3 (3.45)	579.6 (3.77)	544.3 (3.81)	509.6 (4.11)	412.5 (5.23)
71	630.8 (3.50)	578.1 (3.97)	540.9 (3.85)	508.2 (4.28)	412.4 (5.43)
72	631.0 (3.49)	577.9 (3.96)	541.0 (3.86)	507.7 (4.27)	412.2 (5.41)
73	631.1 (3.49)	577.4 (3.95)	541.2 (3.84)	507.4 (4.28)	411.9 (5.39)
74	631.3 (3.48)	577.1 (3.94)	541.3 (3.83)	507.1 (4.26)	411.6 (5.36)
75	631.5 (3.47)	576.9 (3.92)	541.6 (3.83)	506.7 (4.25)	411.5 (5.34)
76	631.8 (3.46)	576.8 (3.91)	541.9 (3.81)	506.2 (4.24)	411.4 (5.32)
77	631.7 (3.45)	576.7 (3.90)	542.3 (3.80)	505.9 (4.21)	411.2 (5.30)
78	631.6 (3.44)	576.5 (3.89)	542.5 (3.78)	505.8 (4.23)	411.1 (5.27)
79	631.5 (3.43)	576.3 (3.88)	542.8 (3.77)	505.7 (4.21)	410.9 (5.25)
80	631.3 (3.44)	576.0 (3.87)	542.9 (3.76)	505.4 (4.19)	410.7 (5.23)
81	633.1 (3.42)	575.8 (3.86)	543.1 (3.75)	505.1 (4.16)	410.4 (5.22)
82	630.0 (3.56)	577.6 (3.92)	542.9 (3.88)	508.7 (4.29)	412.7 (5.22)
83	629.8 (3.55)	577.5 (3.91)	542.8 (3.87)	508.5 (4.29)	412.6 (5.20)
84	629.7 (3.54)	577.4 (3.90)	542.7 (3.86)	508.4 (4.28)	412.4 (5.18)
85	629.5 (3.53)	577.6 (3.91)	542.5 (3.84)	508.3 (4.27)	412.1 (5.17)
86	629.3 (3.51)	577.1 (3.87)	541.3 (3.83)	507.9 (4.25)	411.8 (5.16)
87	629.0 (3.50)	576.9 (3.86)	541.5 (3.82)	507.6 (4.23)	411.7 (5.13)
88	628.8 (3.50)	576.7 (3.84)	541.4 (3.81)	507.3 (4.21)	411.5 (5.16)
89	628.5 (3.46)	576.4 (3.83)	541.3 (3.79)	506.9 (4.20)	411.3 (5.14)
90	628.3 (3.44)	576.1 (3.82)	541.1 (3.77)	506.7 (4.19)	411.1 (5.11)
91	628.2 (3.43)	575.8 (3.81)	540.8 (3.76)	506.5 (4.18)	410.5 (5.10)
92	628.0 (3.42)	575.6 (3.79)	540.5 (3.75)	506.3 (4.17)	410.7 (5.08)
93	631.0 (3.56)	577.6 (3.89)	541.0 (3.77)	508.1 (4.26)	411.4 (5.27)
94	630.9 (3.55)	577.5 (3.87)	541.1 (3.79)	507.7 (4.25)	411.2 (5.25)
95	630.7 (3.53)	577.3 (3.84)	541.2 (3.81)	507.1 (4.23)	410.9 (5.24)
96	630.5 (3.52)	577.2 (3.83)	540.9 (3.84)	506.7 (4.22)	410.7 (5.23)
97	630.3 (3.51)	577.1 (3.82)	540.7 (3.82)	506.4 (4.21)	410.4 (5.21)
98	630.0 (3.49)	577.0 (3.79)	540.5 (3.80)	506.1 (4.18)	410.2 (5.19)
99	630.8 (3.46)	569.9 (3.78)	540.3 (3.79)	505.9 (4.16)	409.8 (5.17)
100	630.5 (3.44)	576.8 (3.76)	540.1 (3.76)	505.7 (4.15)	409.7 (5.15)
101	630.2 (3.43)	576.7 (3.74)	539.9 (3.74)	505.5 (4.13)	410.5 (5.13)
102	629.7 (3.41)	576.5 (3.70)	539.7 (3.73)	505.1 (4.11)	410.2 (5.14)
103	629.4 (3.39)	576.4 (3.67)	539.3 (3.71)	504.7 (4.09)	409.7 (5.12)
104	633.0 (3.63)	578.3 (3.68)	541.0 (3.88)	509.3 (4.33)	413.7 (5.43)
105	633.4 (3.69)	577.7 (3.70)	539.9 (3.83)	508.9 (4.27)	412.6 (5.39
106	634.0 (3.71)	577.1 (3.74)	539.0 (3.79)	508.1 (4.21)	411.2 (5.34)
107	635.1 (3.75)	576.7 (3.72)	538.4 (3.76)	507.6 (4.16)	409.7 (5.29)
108	636.0 (3.76)	576.3 (3.71)	538.0 (3.73)	507.3 (4.13)	409.3 (5.23)
109	631.0 (3.69)	578.3 (3.98)	541.0 (3.88)	509.3 (4.33)	410.7 (5.43)
110	630.7 (3.63)	577.1 (3.83)	540.3 (3.77)	508.7 (4.29)	409.7 (5.39)
111	630.2 (3.60)	576.8 (3.78)	539.7 (3.73)	508.2 (4.23)	409.4 (5.36)
112	629.0 (3.59)	576.3 (3.72)	539.0 (3.67)	507.3 (4.19)	409.3 (5.33)
113	634.0 (3.25)	582.3 (3.74)	547.6 (3.42)	516.0 (4.01)	414.1 (5.26)
114	633.8 (3.24)	582.1 (3.72)	547.4 (3.40)	516.3 (4.03)	414.3 (5.24)
115	633.5 (3.20)	581.7 (3.69)	546.7 (3.35)	516.8 (4.07)	414.8 (5.22)
116	633.4 (3.18)	581.6 (3.67)	546.4 (3.32)	516.9 (4.09)	415.0 (5.23)
117	633.2 (3.17)	581.4 (3.65)	546.1 (3.30)	517.1 (4.11)	415.2 (5.22)
118	633.1 (3.16)	581.2 (3.63)	545.7 (3.28)	517.3 (4.13)	415.3 (5.20)
119	633.0 (3.15)	581.1 (3.61)	545.5 (3.25)	517.6 (4.16)	415.5 (5.19)
120	632.8 (3.13)	580.9 (3.60)	545.3 (3.21)	517.8 (4.17)	415.8 (5.17)
121	632.7 (3.12)	580.7 (3.58)	545.1 (3.19)	517.9 (4.19)	415.9 (5.16)
122	632.5 (3.10)	580.6 (3.56)	544.9 (3.17)	518.2 (4.21)	416.2 (5.15)
123	632.3 (3.07)	580.5 (3.55)	544.7 (3.14)	518.5 (4.23)	416.1 (5.13)
124	634.7 (3.35)	582.3 (3.85)	547.2 (3.90)	516.2 (4.33)	415.1 (5.13)
125	634.5 (3.29)	578.9 (3.83)	546.8 (3.87)	515.8 (4.29)	414.7 (5.10)
126	634.3 (3.26)	576.2 (3.81)	546.3 (3.85)	515.6 (4.25)	414.6 (5.08)
127	634.2 (3.24)	576.1 (3.80)	546.1 (3.83)	515.5 (4.24)	414.5 (5.07)
128	634.1 (3.23)	576.0 (3.78)	545.9 (3.81)	515.3 (4.22)	414.3 (5.05)
129	633.8 (3.21)	575.8 (3.73)	545.7 (3.78)	515.1 (4.21)	414.1 (5.03)
130	633.6 (3.19)	575.5 (3.70)	545.5 (3.74)	514.9 (4.19)	413.9 (5.01)
131	633.4 (3.17)	575.4 (3.67)	545.3 (3.72)	514.7 (4.17)	413.8 (4.99)
132	633.2 (3.16)	575.3 (3.66)	545.1 (3.71)	514.6 (4.15)	413.5 (4.97)
133	634.1 (3.13)	575.1 (3.63)	544.9 (3.70)	514.5 (4.13)	413.3 (4.94)
134	632.3 (3.50)	578.7 (3.85)	546.1 (3.68)	517.2 (4.11)	409.5 (5.34)
135	632.5 (3.48)	578.5 (3.82)	545.8 (3.69)	517.1 (4.10)	409.3 (5.35)
136	633.1 (3.44)	578.2 (3.79)	545.6 (3.71)	516.8 (4.07)	409.3 (5.34)
137	633.3 (3.42)	578.1 (3.77)	545.4 (3.73)	516.6 (4.05)	409.4 (5.32)
138	633.7 (3.40)	578.0 (3.75)	545.3 (3.74)	516.5 (4.03)	409.5 (5.31)
139	633.8 (3.38)	577.9 (3.76)	545.1 (3.75)	516.4 (4.01)	409.6 (5.30)
140	633.9 (3.37)	577.8 (3.74)	545.2 (3.76)	516.2 (3.98)	409.8 (5.28)
141	634.0 (3.35)	577.5 (3.72)	545.0 (3.77)	516.1 (3.97)	409.9 (5.27)
142	634.1 (3.33)	577.3 (3.75)	544.8 (3.78)	518.9 (3.96)	410.0 (5.25)
143	634.5 (3.31)	577.2 (3.93)	544.6 (3.80)	518.7 (3.95)	410.3 (5.39)
144	635.1 (3.49)	579.9 (3.90)	546.3 (3.71)	516.3 (4.18)	414.5 (5.39)
145	635.5 (3.47)	580.0 (3.89)	545.7 (3.72)	516.1 (4.19)	414.3 (5.39)
146	635.9 (3.36)	5881.2 (3.87)	544.5 (3.74)	514.7 (4.21)	413.9 (5.40)
147	636.1 (3.28)	581.4 (3.86)	544.4 (3.75)	514.5 (4.22)	413.8 (5.41)
148	636.3 (3.23)	581.6 (3.85)	544.2 (3.76)	514.3 (4.23)	413.7 (5.40)
149	636.6 (3.20)	581.8 (3.84)	543.9 (3.77)	514.1 (4.24)	413.6 (5.42)
150	636.8 (3.16)	581.9 (3.83)	543.6 (3.78)	513.9 (4.25)	413.5 (5.43)
151	637.1 (3.12)	581.7 (3.81)	543.3 (3.79)	513.7 (4.26)	413.4 (5.39)
152	637.2 (3.10)	581.5 (3.80)	542.2 (3.80)	513.5 (4.27)	413.3 (5.30)
153	638.3 (3.08)	581.3 (3.79)	542.3 (3.81)	513.3 (4.28)	413.2 (5.29)
154	638.5 (3.06)	581.2 (3.78)	541.4 (3.82)	513.1 (4.29)	413.1 (5.28)
155	638.7 (3.05)	579.9 (3.76)	540.4 (3.83)	512.8 (4.30)	412.9 (5.27)
156	638.1 (3.41)	581.9 (3.99)	549.5 (4.02)	517.5 (4.37)	416.6 (5.12)
157	637.6 (3.36)	581.5 (3.95)	549.1 (4.96)	517.1 (4.23)	416.1 (5.08)
158	637.4 (3.35)	581.3 (3.93)	548.8 (4.92)	516.9 (4.21)	415.9 (5.06)
159	637.2 (3.33)	581.1 (3.90)	548.5 (4.89)	516.7 (4.19)	415.7 (5.04)
160	637.0 (3.32)	580.8 (3.89)	548.2 (4.87)	516.4 (4.16)	415.5 (5.03)
161	636.8 (3.30)	580.6 (3.86)	548.0 (4.85)	516.1 (4.13)	415.2 (5.01)
162	636.5 (3.28)	580.3 (3.82)	547.9 (4.83)	515.9 (4.11)	415.0 (5.29)
163	636.2 (3.27)	580.1 (3.80)	547.6 (4.81)	515.6 (4.09)	414.9 (5.27)
164	636.0 (3.25)	579.9 (3.79)	547.4 (4.79)	515.4 (4.06)	414.7 (5.24)
165	635.8 (3.23)	579.6 (3.76)	547.2 (4.76)	515.2 (4.03)	414.4 (5.21)
166	635.6 (3.21)	577.4 (3.74)	547.0 (4.73)	515.0 (4.01)	414.1 (5.19)
167	635.2 (3.19)	577.1 (3.72)	546.7 (4.71)	514.8 (3.98)	414.0 (5.16)
168	634.9 (3.50)	571.7 (3.89)	548.1 (3.84)	518.1 (4.07)	413.2 (5.26)
169	634.5 (3.49)	571.3 (3.87)	547.9 (3.83)	517.7 (4.04)	413.1 (5.23)
170	634.3 (3.47)	571.1 (3.85)	547.7 (3.82)	517.3 (4.03)	412.9 (5.21)
171	634.1 (3.46)	570.9 (3.82)	547.5 (3.81)	517.1 (4.01)	412.8 (5.19)
172	633.8 (3.43)	570.6 (3.80)	547.2 (3.78)	516.9 (3.98)	412.6 (5.17)
173	633.6 (3.41)	570.4 (3.76)	547.0 (3.76)	516.7 (3.97)	412.3 (5.15)
174	633.3 (3.38)	570.2 (3.75)	546.8 (3.74)	516.4 (3.96)	412.1 (5.12)
175	633.1 (3.36)	570.1 (3.74)	546.7 (3.73)	516.1 (3.95)	411.9 (5.10)
176	632.9 (3.33)	569.9 (3.72)	546.6 (3.70)	515.9 (3.91)	411.7 (5.07)
177	632.8 (3.31)	569.8 (3.71)	546.3 (3.67)	513.7 (3.89)	411.4 (5.05)
178	632.7 (3.29)	569.7 (3.67)	546.1 (3.65)	513.5 (3.86)	411.2 (5.03)
179	632.3 (3.23)	569.3 (3.63)	545.6 (3.61)	513.1 (3.81)	411.0 (4.97)
180	632.4 (3.34)	568.3 (3.73)	546.6 (3.71)	512.1 (3.73)	410.0 (4.92)
181	632.1 (3.32)	568.1 (3.71)	546.4 (3.69)	512.0 (4.71)	409.8 (5.22)
182	631.8 (3.30)	567.9 (3.69)	546.3 (3.68)	511.7 (4.69)	409.7 (5.22)
183	631.7 (3.25)	567.5 (3.67)	546.1 (3.67)	511.5 (4.67)	409.6 (5.20)
184	631.5 (3.24)	567.4 (3.65)	545.9 (3.66)	511.4 (4.65)	409.4 (5.18)
185	631.3 (3.23)	567.2 (3.63)	545.5 (3.64)	511.3 (4.63)	409.1 (5.17)
186	631.1 (3.21)	567.1 (3.61)	545.3 (3.63)	511.1 (4.61)	408.8 (5.16)
187	629.9 (3.20)	567.0 (3.59)	545.2 (3.61)	510.9 (4.59)	408.7 (5.13)
188	629.8 (3.18)	566.7 (3.57)	545.1 (3.59)	510.7 (4.56)	408.6 (5.16)
189	629.5 (3.16)	566.4 (3.53)	544.9 (3.57)	510.5 (4.53)	408.3 (5.14)
190	629.2 (3.13)	565.8 (3.51)	544.5 (3.53)	510.1 (4.48)	407.9 (5.10)
191	629.0 (3.12)	565.6 (3.49)	544.3 (3.51)	509.9 (4.47)	407.7 (5.08)
192	635.4 (3.32)	565.0 (3.78)	547.6 (3.81)	514.1 (3.75)	412.0 (4.82)
193	635.3 (3.30)	564.8 (3.76)	547.2 (3.80)	514.0 (3.73)	411.9 (5.80)
194	635.1 (3.28)	564.6 (3.75)	547.0 (3.78)	513.7 (3.72)	411.7 (5.77)
195	634.8 (3.27)	564.3 (3.73)	546.7 (3.76)	511.4 (3.71)	411.4 (5.75)
196	634.6 (3.26)	564.0 (3.70)	546.5 (3.75)	511.1 (3.68)	411.2 (73)
197	634.4 (3.23)	563.9 (3.68)	546.3 (3.73)	510.9 (3.65)	410.9 (5.70)
198	634.2 (3.21)	563.8 (3.66)	546.1 (3.72)	510.7 (3.63)	410.7 (5.67)
199	634.0 (3.19)	563.7 (3.64)	545.9 (3.70)	510.5 (3.60)	410.5 (5.64)
200	633.7 (3.17)	563.5 (3.61)	545.7 (3.68)	510.1 (3.58)	410.2 (5.63)
201	633.0 (3.13)	563.3 (3.58)	545.0 (3.65)	509.3 (3.51)	409.7 (5.57)
202	632.7 (3.11)	563.1 (3.56)	544.9 (3.63)	509.2 (3.49)	409.5 (5.54)
203	632.5 (3.09)	562.9 (3.54)	544.6 (3.61)	508.9 (3.46)	409.2 (5.51)
204	635.4 (3.32)	565.0 (3.78)	546.6 (3.73)	514.1 (3.71)	411.6 (4.85)
205	635.2 (3.29)	564.8 (3.75)	546.4 (3.71)	513.8 (3.69)	411.3 (4.83)
206	635.0 (3.27)	564.5 (3.72)	546.2 (3.68)	513.6 (3.66)	411.0 (4.80)
207	634.7 (3.23)	564.3 (3.69)	546.0 (3.65)	511.4 (3.63)	410.7 (4.77)
208	634.3 (3.21)	564.1 (3.66)	545.9 (3.63)	511.2 (3.60)	410.4 (4.75)
209	634.1 (3.19)	563.8 (3.63)	545.7 (3.61)	510.8 (3.57)	410.3 (4.73)
210	634.0 (3.17)	563.5 (3.61)	545.4 (3.58)	510.5 (3.55)	410.1 (4.72)
211	633.8 (3.14)	563.3 (3.59)	545.3 (3.55)	510.3 (3.52)	409.8 (4.70)
212	633.4 (3.09)	562.8 (3.53)	544.8 (3.49)	509.9 (3.45)	409.5 (4.64)
213	633.2 (3.06)	562.5 (3.51)	544.5 (3.46)	509.7 (3.42)	409.4 (4.61)
214	633.0 (3.04)	562.3 (3.49)	544.2 (3.44)	509.3 (3.39)	409.3 (4.59)
215	632.7 (3.01)	562.1 (3.47)	544.0 (3.67)	509.1 (3.36)	409.1 (4.56)
216	639.4 (3.52)	561.0 (3.74)	545.6 (3.99)	515.1 (3.79)	412.0 (4.99)
217	639.2 (3.50)	560.8 (3.73)	545.4 (3.91)	514.8 (3.76)	411.9 (4.96)
218	639.0 (3.47)	560.5 (3.72)	545.2 (3.88)	514.6 (3.73)	411.7 (4.95)
219	638.7 (3.43)	560.3 (3.69)	545.0 (3.85)	514.4 (3.71)	411.3 (4.93)
220	638.3 (3.41)	560.1 (3.66)	544.9 (3.83)	514.2 (3.70)	411.1 (4.91)
221	638.1 (3.39)	559.8 (3.64)	544.7 (3.81)	514.1 (3.67)	410.7 (4.89)
222	637.9 (3.37)	559.5 (3.63)	544.4 (3.78)	513.9 (3.65)	410.5 (4.87)
223	637.4 (3.30)	559.1 (3.59)	544.1 (3.72)	513.4 (3.59)	410.0 (4.83)
224	637.1 (3.27)	558.8 (3.56)	543.9 (3.70)	513.2 (3.56)	409.7 (4.81)
225	636.9 (3.26)	558.5 (3.54)	543.7 (3.66)	513.0 (3.53)	409.4 (4.79)
226	636.7 (3.24)	558.3 (3.53)	543.5 (3.64)	512.9 (3.51)	409.3 (4.76)
227	636.4 (3.22)	558.1 (3.51)	543.3 (3.62)	512.7 (3.50)	409.1 (4.73)
228	636.1 (3.20)	557.9 (3.49)	543.1 (3.59)	512.3 (3.49)	408.9 (4.70)
229	639.4 (3.52)	561.0 (3.70)	544.6 (3.95)	515.1 (3.77)	411.0 (5.00)
230	639.3 (3.49)	560.8 (3.76)	544.3 (3.93)	514.9 (3.75)	410.8 (4.98)
231	639.1 (3.47)	560.6 (3.74)	544.1 (3.91)	514.7 (3.73)	410.7 (4.95)
232	638.9 (3.45)	560.5 (3.73)	539.9 (3.88)	514.5 (3.72)	410.5 (4.93)
233	570.0 (3.66)	538.0 (3.78)			409.0 (4.61)
234	570.1 (3.66)	538.2 (3.77)			409.1 (4.60)
235	570.1 (3.67)	538.3 (3.78)			409.2 (4.62)
236	570.2 (3.67)	538.4 (3.79)			409.3 (4.62)
237	570.2 (3.68)	538.4 (3.79)			409.4 (4.63)
238	570.3 (3.68)	538.3 (3.80)			409.4 (4.64)
239	570.4 (3.69)	538.5 (3.81)			409.5 (4.65)
240	570.4 (3.70)	538.6 (3.81)			409.5 (4.65)
241	570.5 (3.70)	538.7 (3.82)			409.6 (4.66)
242	570.5 (3.71)	538.7 (3.83)			409.7 (4.67)
243	570.6 (3.72)	538.8 (3.79)			409.7 (4.67)
244	570.7 (3.73)	538.9 (3.81)			409.8 (4.69)
245	570.8 (3.73)	538.9 (3.82)			409.9 (4.69)
246	570.8 (3.74)	539.0 (3.83)			410.1 (4.70)
247	570.9 (3.75)	539.1 (3.84)			410.2 (4.71)
248	570.3 (3.57)	538.0 (3.76)			409.1 (4.61)
249	570.3 (3.58)	538.1 (3.77)			409.6 (4.62)
250	570.4 (3.59)	538.2 (3.77)			409.6 (4.62)
251	570.5 (3.67)	538.2 (3.78)			409.7 (4.63)
252	570.5 (3.67)	538.3 (3.79)			409.7 (4.64)
253	570.6 (3.68)	538.3 (3.80)			409.8 (4.65)
254	570.6 (3.68)	538.4 (3.80)			409.9 (4.65)
255	570.7 (3.69)	538.4 (3.81)			409.9 (4.66)
256	570.7 (3.70)	538.5 (3.82)			410.1 (4.65)
257	570.8 (3.70)	538.6 (3.83)			410.1 (4.66)
258	570.8 (3.70)	538.6 (3.83)			410.2 (4.67)
259	571.6 (3.71)	538.7 (3.84)			409.37 (4.68)
260	570.5 (3.67)	538.3 (3.79)			409.7 (4.64)
261	570.6 (3.68)	538.3 (3.80)			409.8 (4.65)
262	570.6 (3.68)	538.4 (3.80)			409.9 (4.65)
263	570.7 (3.69)	538.4 (3.81)			409.9 (4.66)
264	570.7 (3.70)	538.5 (3.82)			410.1 (4.65)
265	570.8 (3.70)	538.6 (3.83)			410.1 (4.66)
266	570.8 (3.70)	538.6 (3.83)			410.2 (4.67)
267	570.7 (3.70)	538.5 (3.82)			410.1 (4.65)
268	570.8 (3.70)	538.6 (3.83)			410.1 (4.66)
269	570.8 (3.70)	538.6 (3.83)			410.2 (4.67)
270	571.9 (3.64)	538.5 (3.82)			410.1 (4.52)
271	571.8 (3.63)	538.4 (3.81)			409.37 (4.68)
272	571.8 (3.63)	538.3 (3.79)			409.7 (4.64)
273	571.7 (3.62)	538.2 (3.80)			409.8 (4.65)
274	571.6 (3.62)	538.2 (3.78)			409.9 (4.65)
275	571.5 (3.61)	538.1 (3.78)			409.9 (4.66)
276	571.4 (3.60)	538.0 (3.77)			410.1 (4.65)
277	571.3 (3.59)	537.9 (3.76)			410.1 (4.66)
278	571.3 (3.58)	537.8 (3.75)			410.2 (4.67)
279	571.2 (3.57)	537.7 (3.75)			410.1 (4.65)
280	571.1 (3.56)	537.6 (3.74)			410.1 (4.65)
281	571.2 (3.69)	539.4 (3.92)			409.4 (4.55)
282	571.1 (3.67)	539.3 (3.91)			409.3 (4.55)
283	571.0 (3.66)	539.2 (3.90)			409.2 (4.54)
284	571.9 (3.65)	539.1 (3.89)			409.1 (4.53)
285	571.8 (3.64)	539.0 (3.88)			409.1 (4.52)
286	571.7 (3.63)	538.9 (3.87)			409.0 (4.51)
287	571.5 (3.62)	538.7 (3.86)			408.8 (4.50)
288	571.4 (3.62)	538.5 (3.84)			408.7 (4.49)
289	571.3 (3.61)	538.3 (3.83)			408.6 (4.47)
290	571.2 (3.60)	538.2 (3.82)			408.5 (4.46)
291	571.1 (3.68)	538.1 (3.81)			408.4 (4.45)
292	573.2 (3.66)	541.4 (3.78)			411.4 (4.25)
293	573.1 (3.67)	541.3 (3.77)			411.3 (4.23)
294	573.0 (3.65)	541.2 (3.76)			411.2 (4.21)
295	572.9 (3.64)	541.1 (3.75)			411.1 (4.20)
296	572.8 (3.63)	541.0 (3.74)			411.0 (4.19)
297	572.7 (3.63)	540.9 (3.74)			410.9 (4.20)
298	572.6 (3.62)	540.7 (3.73)			410.8 (4.18)
299	572.4 (3.61)	540.6 (3.72)			410.7 (4.17)
300	572.3 (3.60)	540.5 (3.71)			410.6 (4.15)
301	572.2 (3.59)	540.3 (3.70)			410.5 (4.16)
302	572.1 (3.58)	540.1 (3.68)			410.3 (4.13)
303	575.5 (3.72)	543.7 (3.89)			412.9 (4.31)
304	575.4 (3.71)	543.6 (3.87)			411.3 (4.23)
305	575.3 (3.71)	543.5 (3.86)			411.2 (4.21)
306	575.2 (3.70)	543.3 (3.85)			411.1 (4.20)
307	575.1 (3.69)	543.2 (3.84)			411.0 (4.19)
308	575.0 (3.68)	543.1 (3.83)			410.9 (4.20)
309	574.9 (3.67)	543.0 (3.82)			410.8 (4.18)
310	574.9 (3.68)	542.9 (3.81)			410.7 (4.17)
311	574.8 (3.66)	542.7 (3.80)			410.6 (4.15)
312	574.7 (3.65)	542.6 (3.79)			410.5 (4.16)
313	574.5 (3.64)	542.5 (3.78)			410.3 (4.13)
314	572.0 (3.61)	542.3 (3.77)			410.9 (4.58)
315	571.9 (3.62)	537.4 (3.72)			410.8 (4.57)
316	571.8 (3.61)	537.3 (3.71)			410.8 (4.56)
317	571.7 (3.61)	537.2 (3.71)			410.7 (4.55)
318	571.6 (3.60)	537.1 (3.70)			410.6 (4.55)
319	571.5 (3.58)	537.0 (3.69)			410.5 (4.53)
320	571.4 (3.59)	536.9 (3.68)			410.4 (4.53)
321	571.3 (3.57)	536.8 (3.67)			410.3 (4.52)
322	571.1 (3.56)	536.7 (3.65)			410.2 (4.51)
323	571.0 (3.55)	536.6 (3.65)			410.1 (4.49)
324	571.0 (3.54)	536.4 (3.64)			410.0 (4.48)
325	572.0 (3.60)	539.4 (3.77)			410.9 (4.60)
326	571.9 (3.59)	539.3 (3.76)			410.8 (4.59)
327	571.8 (3.59)	539.3 (3.75)			410.7 (4.58)
328	571.7 (3.58)	539.2 (3.74)			410.6 (4.57)
329	571.6 (3.59)	539.1 (3.73)			410.6 (4.56)
330	571.6 (3.57)	539.0 (3.72)			410.5 (4.55)
331	571.5 (3.56)	538.9 (3.71)			410.4 (4.54)
332	571.4 (3.55)	539.0 (3.71)			410.4 (4.53)
333	571.2 (3.55)	538.8 (3.69)			410.2 (4.51)
334	571.1 (3.54)	538.7 (3.68)			410.2 (4.49)
335	571.0 (3.53)	538.6 (3.67)			410.1 (4.47)
